# Supplementary material
Source: PubMed Central journal article supplement (PMC7118577)
Supplement: mmc1.pdf [file mmc1.pdf]

**The American Journal of Human Genetics, Volume 106**

## **Supplemental Data**

### **Incidence, Origin, and Predictive Model for the Detection and Clinical Management of Segmental Aneuploidies in Human Embryos**

**Laura Girardi, Munevver Serdarogullari, Cristina Patassini, Maurizio Poli, Marco Fabiani, Silvia Caroselli, Onder Coban, Necati Findikli, Fazilet Kubra Boynukalin, Mustafa Bahceci, Rupali Chopra, Rita Canipari, Danilo Cimadomo, Laura Rienzi, Filippo Ubaldi, Eva Hoffmann, Carmen Rubio, Carlos Simon, and Antonio Capalbo**

**Figure S1 - Examples of PGT-A profile plots displaying different segmental aneuploidies configurations reconstructed from five multifocal blastocyst biopsies.**

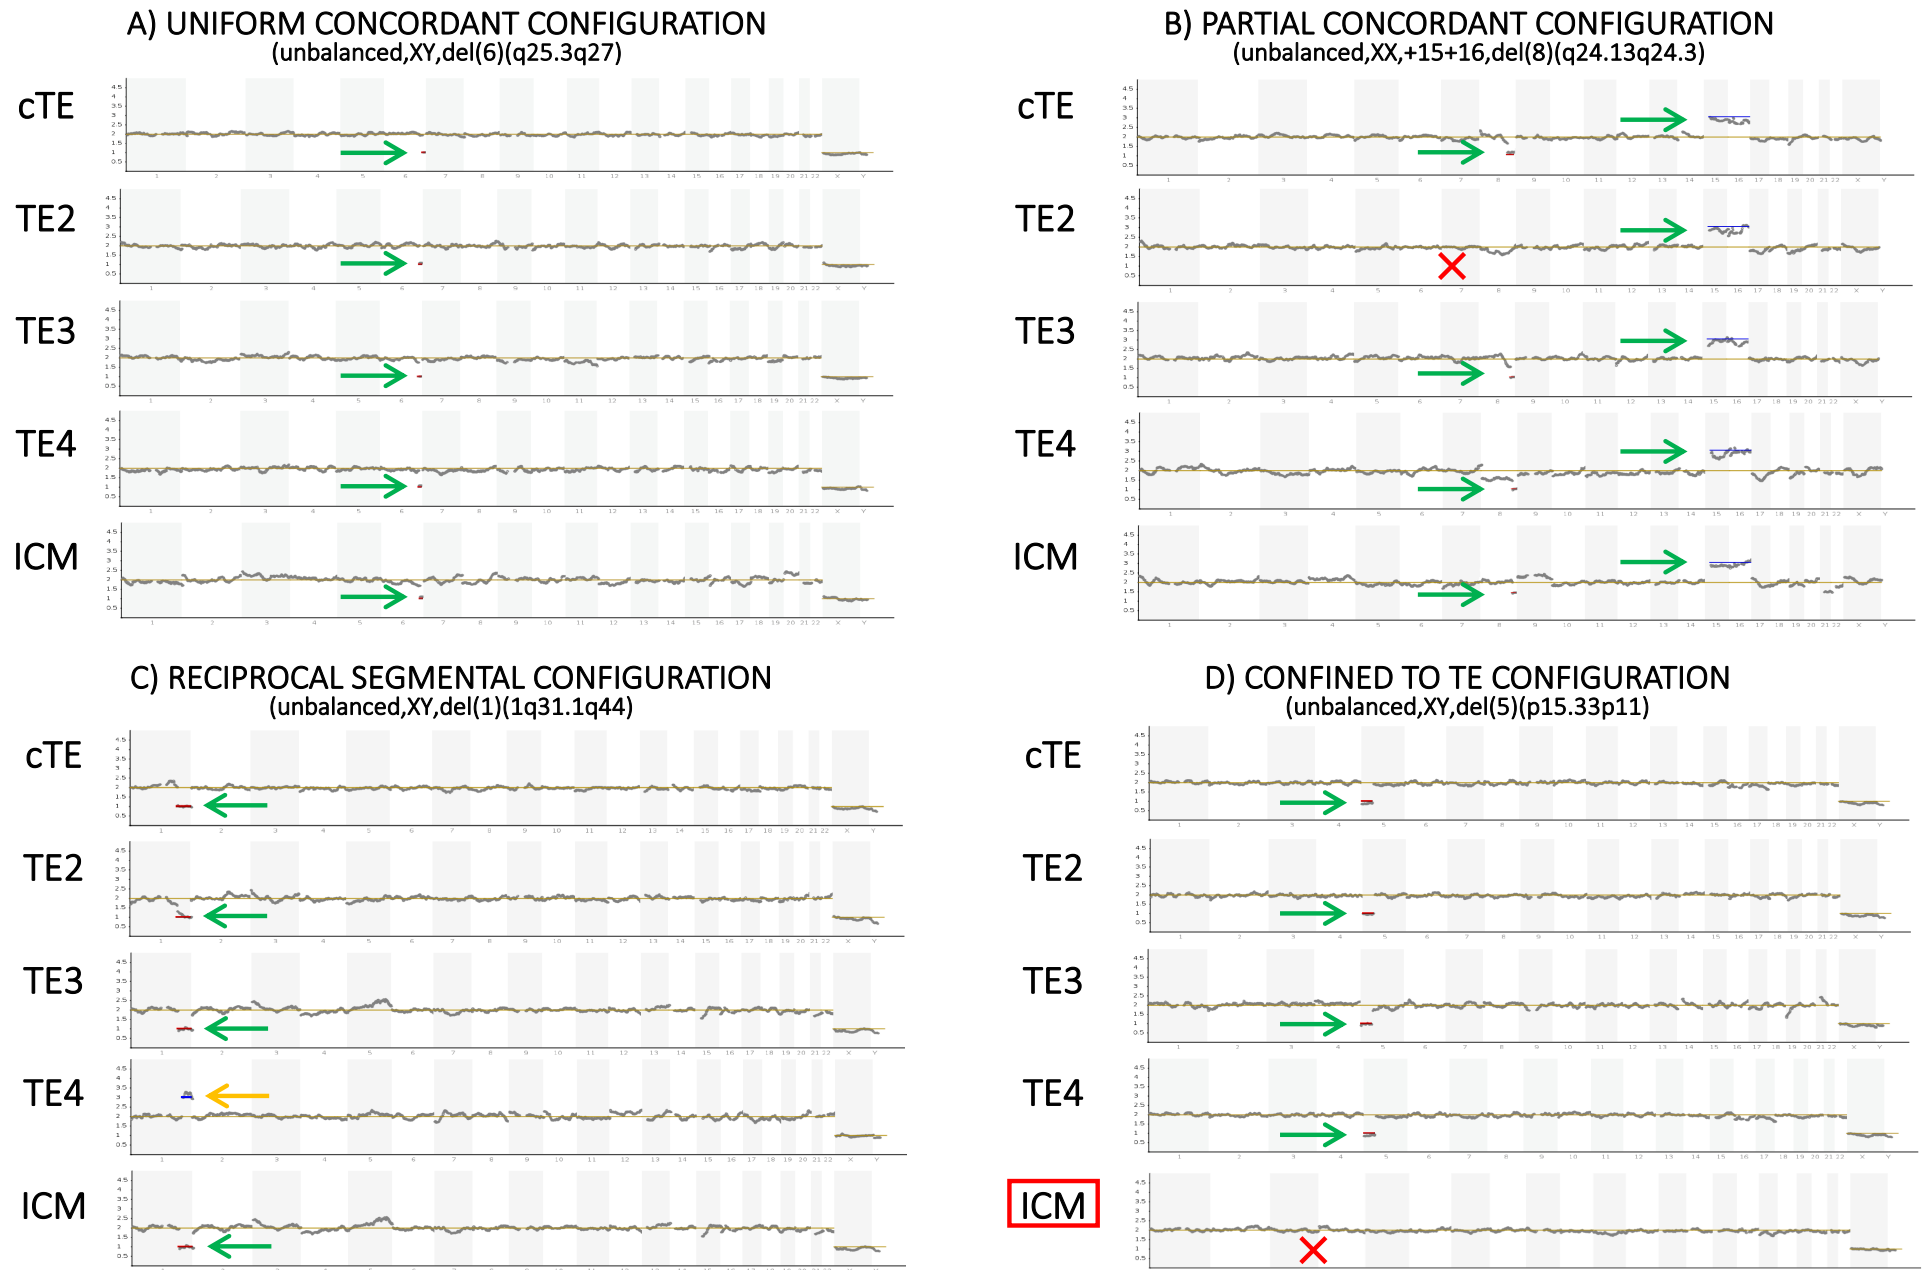

**Figure S1: A)** Uniform concordant configuration; **B)** Partial concordant configuration; **C)** Reciprocal segmental configuration and **D)** Confined to TE configuration. *cTE*, clinical trophoctoderm biopsy; *TE2*, second trophoctoderm biopsy; *TE3*, third trophoctoderm biopsy; *TE4*, fourth trophoctoderm biopsy; *ICM*, inner cell mass biopsy. Green arrow = confirmed aneuploidy; Yellow arrow = reciprocal aneuploidy; Red cross = unconfirmed aneuploidy.

**Table S1 (A, B, C).** NGS validation data

**A**

| Barcode | Sample ID | Karyotype            | Ion chef + S5 results | READS   | MAPD  |
|---------|-----------|----------------------|-----------------------|---------|-------|
| 1       | 01        | unbalanced,XX,+22    | unbalanced,XX,+22     | 191,690 | 0.146 |
| 2       | 02        | unbalanced,XX,+22    | unbalanced,XX,+22     | 193,168 | 0.149 |
| 3       | 03        | unbalanced,XX,+20    | unbalanced,XX,+20     | 145,459 | 0.162 |
| 4       | 04        | unbalanced,XX,+20    | unbalanced,XX,+20     | 161,303 | 0.160 |
| 5       | 05        | unbalanced,XY,+2,+21 | unbalanced,XY,+2,+21  | 206,235 | 0.142 |
| 6       | 06        | unbalanced,XY,+2,+21 | unbalanced,XY,+2,+21  | 146,702 | 0.163 |
| 7       | 07        | unbalanced,XXX       | unbalanced,XXX        | 191,553 | 0.146 |
| 8       | 08        | unbalanced,XXX       | unbalanced,XXX        | 158,018 | 0.159 |
| 9       | 09        | unbalanced,XXY       | unbalanced,XXY        | 176,303 | 0.190 |
| 10      | 10        | unbalanced,XXY       | unbalanced,XXY        | 173,232 | 0.141 |
| 11      | 11        | unbalanced,XXY       | unbalanced,XXY        | 229,748 | 0.140 |
| 12      | 12        | unbalanced,XXY       | unbalanced,XXY        | 92,464  | 0.196 |
| 13      | 13        | unbalanced,XY,+13    | unbalanced,XY,+13     | 154,963 | 0.164 |
| 14      | 14        | unbalanced,XY,+13    | unbalanced,XY,+13     | 92,623  | 0.192 |
| 15      | 15        | unbalanced,XY,+18    | unbalanced,XY,+18     | 171,875 | 0.176 |
| 16      | 16        | unbalanced,XY,+18    | unbalanced,XY,+18     | 142,992 | 0.156 |
| 17      | 17        | unbalanced,XY,+21    | unbalanced,XY,+21     | 160,188 | 0.162 |
| 18      | 18        | unbalanced,XY,+21    | unbalanced,XY,+21     | 135,325 | 0.172 |
| 19      | 19        | balanced,XX          | balanced,XX           | 145,428 | 0.169 |
| 20      | 20        | balanced,XX          | balanced,XX           | 212,568 | 0.131 |
| 21      | 21        | balanced,XY          | balanced,XY           | 173,466 | 0.160 |
| 22      | 22        | balanced,XY          | balanced,XY           | 211,861 | 0.144 |
| 23      | 23        | unbalanced,XX,+2,+21 | unbalanced,XX,+2,+21  | 172,647 | 0.148 |
| 24      | 24        | unbalanced,XX,+2,+21 | unbalanced,XX,+2,+21  | 153,313 | 0.159 |
| 25      | 25        | unbalanced,XX,+22    | unbalanced,XX,+22     | 205,168 | 0.143 |
| 26      | 26        | unbalanced,XX,+22    | unbalanced,XX,+22     | 211,714 | 0.140 |
| 27      | 27        | unbalanced,XX,+20    | unbalanced,XX,+20     | 222,030 | 0.128 |
| 28      | 28        | unbalanced,XX,+20    | unbalanced,XX,+20     | 200,551 | 0.139 |
| 29      | 29        | unbalanced,XY,+2,+21 | unbalanced,XY,+2,+21  | 224,145 | 0.142 |
| 30      | 30        | unbalanced,XY,+2,+21 | unbalanced,XY,+2,+21  | 237,787 | 0.134 |
| 31      | 31        | unbalanced,XXX       | unbalanced,XXX        | 129,491 | 0.174 |
| 32      | 32        | unbalanced,XXX       | unbalanced,XXX        | 152,358 | 0.176 |
| 33      | 33        | unbalanced,XXY       | unbalanced,XXY        | 163,214 | 0.218 |
| 34      | 34        | unbalanced,XXY       | unbalanced,XXY        | 140,940 | 0.170 |
| 35      | 35        | unbalanced,XXY       | unbalanced,XXY        | 183,140 | 0.147 |
| 36      | 36        | unbalanced,XXY       | unbalanced,XXY        | 141,553 | 0.157 |
| 37      | 37        | unbalanced,XY,+13    | unbalanced,XY,+13     | 135,030 | 0.170 |
| 38      | 38        | unbalanced,XY,+13    | unbalanced,XY,+13     | 141,076 | 0.164 |
| 39      | 39        | unbalanced,XY,+18    | unbalanced,XY,+18     | 179,381 | 0.161 |
| 40      | 40        | unbalanced,XY,+18    | unbalanced,XY,+18     | 125,481 | 0.182 |
| 41      | 41        | unbalanced,XY,+21    | unbalanced,XY,+21     | 135,749 | 0.195 |
| 42      | 42        | unbalanced,XY,+21    | unbalanced,XY,+21     | 111,040 | 0.186 |
| 43      | 43        | balanced,XX          | balanced,XX           | 193,936 | 0.143 |
| 44      | 44        | balanced,XX          | balanced,XX           | 234,345 | 0.138 |
| 45      | 45        | balanced,XY          | balanced,XY           | 208,501 | 0.187 |
| 46      | 46        | balanced,XY          | balanced,XY           | 155,989 | 0.153 |
| 47      | 47        | unbalanced,XX,+22    | unbalanced,XX,+22     | 173,663 | 0.151 |
| 48      | 48        | unbalanced,XX,+22    | unbalanced,XX,+22     | 168,681 | 0.158 |

| Summary of validation results       |                                       |
|-------------------------------------|---------------------------------------|
| Concordant diagnosis per sample     | 100%, n=48/48;(95%CI=93.41-98.24)     |
| Concordant diagnosis per chromosome | 100%, n=1104/1104;95%CI=99.75-99.95   |
| Sensitivity per chromosome          | 100.0% (n=46/46;95%CI=92.29-100.00)   |
| Specificity per chromosome          | 100% (n=1058/1058;95%CI=99.65-100.00) |

**A:** Validation data of whole chromosome aneuploid detection from cell lines with known whole chromosome alterations.

**B**

| Barcode | Sample ID | Karyotype TE1                      | Length | Karyotype TE2                      | READS   | MAPD  |
|---------|-----------|------------------------------------|--------|------------------------------------|---------|-------|
| 1       | 01        | unbalanced,XY,del(15)(q11.2q13)    | 7.8 Mb | unbalanced,XY,del(15)(q11.2q13)    | 328,338 | 0.195 |
| 2       | 02        | unbalanced,XX,del(5)(p15.3)pat.ish | 5.8Mb  | unbalanced,XY,del(5)(p15.33p15.32) | 303,345 | 0.138 |
| 3       | 03        | unbalanced,XY,del(5)(p15.2p14)     | 6.1 Mb | unbalanced,XY,del(5)(p15.31p14.3)  | 259,805 | 0.156 |
| 4       | 04        | unbalanced,XY,del(20)(p12p11.2)    | 5.8 Mb | unbalanced,XY,del(20)(p12.2p11.23) | 418,440 | 0.114 |
| 5       | 05        | unbalanced,XY,del(15)(q11.2q13)    | 7.8 Mb | unbalanced,XY,del(15)(q11.2q13)    | 260,634 | 0.146 |
| 6       | 06        | unbalanced,XX,del(5)(p15.3)pat.ish | 5.8Mb  | unbalanced,XX,del(5)(p15.33p15.32) | 171,997 | 0.149 |
| 7       | 07        | unbalanced,XY,del(5)(p15.2p14)     | 6.1 Mb | unbalanced,XY,del(5)(p15.31p14.3)  | 128,956 | 0.176 |
| 8       | 08        | unbalanced,XY,del(20)(p12p11.2)    | 5.8 Mb | unbalanced,XY,del(20)(p12.2p11.23) | 190,785 | 0.126 |
| 9       | 09        | unbalanced,XY,del(15)(q11.2q13)    | 7.8 Mb | unbalanced,XY,del(15)(q11.2q13)    | 159,202 | 0.116 |
| 10      | 10        | unbalanced,XX,del(5)(p15.3)pat.ish | 5.8Mb  | unbalanced,XY,del(5)(p15.33p15.32) | 356,937 | 0.126 |
| 11      | 11        | unbalanced,XY,del(5)(p15.2p14)     | 6.1 Mb | unbalanced,XY,del(5)(p15.31p14.3)  | 198,055 | 0.126 |
| 12      | 12        | unbalanced,XY,del(20)(p12p11.2)    | 5.8 Mb | unbalanced,XY,del(20)(p12p11.2)    | 102,049 | 0.12  |
| 13      | 13        | unbalanced,XY,del(15)(q11.2q13)    | 7.8 Mb | unbalanced,XY,del(15)(q11.2q13)    | 328,338 | 0.195 |
| 14      | 14        | unbalanced,XX,del(5)(p15.3)pat.ish | 5.8Mb  | unbalanced,XY,del(5)(p15.33p15.32) | 303,345 | 0.138 |
| 15      | 15        | unbalanced,XY,del(5)(p15.2p14)     | 6.1 Mb | unbalanced,XY,del(5)(p15.31p14.3)  | 259,805 | 0.156 |
| 16      | 16        | unbalanced,XY,del(20)(p12p11.2)    | 5.8 Mb | unbalanced,XY,del(20)(p12.2p11.23) | 418,440 | 0.114 |
| 17      | 17        | unbalanced,XY,del(15)(q11.2q13)    | 7.8 Mb | unbalanced,XY,del(15)(q11.2q13)    | 260,634 | 0.146 |
| 18      | 18        | unbalanced,XX,del(5)(p15.3)pat.ish | 5.8Mb  | unbalanced,XX,del(5)(p15.33p15.32) | 171,997 | 0.149 |
| 19      | 19        | unbalanced,XY,del(5)(p15.2p14)     | 6.1 Mb | unbalanced,XY,del(5)(p15.31p14.3)  | 128,956 | 0.176 |
| 20      | 20        | unbalanced,XY,del(20)(p12p11.2)    | 5.8 Mb | unbalanced,XY,del(20)(p12.2p11.23) | 190,785 | 0.126 |
| 21      | 21        | unbalanced,XY,del(15)(q11.2q13)    | 7.8 Mb | unbalanced,XY,del(15)(q11.2q13)    | 159,202 | 0.116 |
| 22      | 22        | unbalanced,XX,del(5)(p15.3)pat.ish | 5.8Mb  | unbalanced,XY,del(5)(p15.33p15.32) | 356,937 | 0.126 |
| 23      | 23        | unbalanced,XY,del(5)(p15.2p14)     | 6.1 Mb | unbalanced,XY,del(5)(p15.31p14.3)  | 198,055 | 0.126 |
| 24      | 24        | unbalanced,XY,del(20)(p12p11.2)    | 5.8 Mb | unbalanced,XY,del(20)(p12p11.2)    | 102,049 | 0.12  |

| Summary of validation results       |                                      |
|-------------------------------------|--------------------------------------|
| Concordant diagnosis per sample     | 100%, n=24/24;(95%CI=85.75-100.00)   |
| Concordant diagnosis per chromosome | 100%, n=552/552;(95%CI=99.33-100.00) |
| Sensitivity per chromosome          | 100%, n=24/24;(95%CI=85.75-100.00)   |
| Specificity per chromosome          | 100%, n=528/528;(95%CI=99.30-100.00) |

**B:** Validation data of segmental aneuploid detection from cell lines with known sub-chromosomal alterations.

**C**

| Bar code | Sample ID | Abnormal parental Karyotype | First biopsy result                                                                         | READS   | MAPD  | Second biopsy result results                                                                | READS   | MAPD  |
|----------|-----------|-----------------------------|---------------------------------------------------------------------------------------------|---------|-------|---------------------------------------------------------------------------------------------|---------|-------|
| 1        | 01        | 46,XX,t(7;18)(p14;q21.3)    | unbalanced,XX,del(7)(p22.3p14.3),<br>dup(18)(q21.32q23)                                     | 113,812 | 0.185 | unbalanced,XX,del(7)(p22.3p14.3),<br>dup(18)(q21.32q23)                                     | 202,171 | 0.131 |
| 2        | 02        | 46,XY,t(1;16)(p34;p13.3)    | unbalanced,XY,del(1)(p36.33p34.3)                                                           | 252,551 | 0.156 | unbalanced,XY,del(1)(p36.33p34.3)                                                           | 255,934 | 0.15  |
| 3        | 03        | 46,XY,t(8;22)(q24;q11)      | unbalanced,XY, del(8)(q24.13q24.3),<br>dup(22q11.1q13.33)                                   | 237,043 | 0.161 | unbalanced,XY, del(8)(q24.13q24.3),<br>dup(22q11.1q13.33)                                   | 203,842 | 0.145 |
| 4        | 04        | 46,XX,t(1;4)(q21p14)        | unbalanced,XX,dup(1)(q23.3q44),<br>del(4)(p16.3p15.2)                                       | 302,629 | 0.137 | unbalanced,XX,dup(1)(q23.3q44),<br>del(4)(p16.3p15.2)                                       | 263,016 | 0.14  |
| 5        | 05        | 46,XY,t(7;18)(q11.1;q11.1)  | unbalanced,XX,dup(7)(p22.3p11.1),<br>del(18)(p11.32p11.21)                                  | 213,837 | 0.159 | unbalanced,XX,dup(7)(p22.3p11.1),<br>del(18)(p11.32p11.21)                                  | 275,063 | 0.146 |
| 6        | 06        | 46,XY,t(5;10)(p13;q11.2)    | unbalanced,XX,del(5)(p13.3q35.3),<br>dup(10)(p15.3q11.23)                                   | 263,529 | 0.163 | unbalanced,XX,del(5)(p13.3q35.3),<br>dup(10)(p15.3q11.23)                                   | 349,467 | 0.15  |
| 7        | 07        | 46,XX,t(6;8)(q21;q24.1)     | unbalanced,XY,dup(6)(q21q27)                                                                | 137,716 | 0.155 | unbalanced,XY,dup(6)(q21q27)                                                                | 206,620 | 0.165 |
| 8        | 08        | 46,XX,t(11;18)(p11.2;q21.1) | unbalanced,XX,del(11)(p15.5p12),<br>dup(18)(q21.32q23)                                      | 389,210 | 0.136 | unbalanced,XX,del(11)(p15.5p12),<br>dup(18)(q21.32q23)                                      | 255,902 | 0.137 |
| 9        | 09        | 46,XY,t(4;7)(q27;p15)       | unbalanced,XX,del(4)(q27q35.2),<br>dup(7)(p22.3p14.3)                                       | 333,194 | 0.141 | unbalanced,XX,del(4)(q27q35.2),<br>dup(7)(p22.3p14.3)                                       | 265,908 | 0.137 |
| 10       | 10        | 46,XX,t(2;13)(q33;q12)      | unbalanced,XX,dup(2)(p25.3q35)<br>del(2)(q35q37.3),del(13)(q11q14.1),<br>dup(13)(q14.11q34) | 255,555 | 0.153 | unbalanced,XX,dup(2)(p25.3q35)<br>del(2)(q35q37.3),del(13)(q11q14.1),<br>dup(13)(q14.11q34) | 234,603 | 0.154 |

**C:** Validation data of know meiotic segmental aneuploidies detected with PGT-SR in trophoctoderm rebiopsies.

**Table S2:** Complete overview of blastocyst profiles from aneuploid and euploid cTE samples.

| Embryo ID | Embryo grade | Patient Age | ICM biopsy                                | Clinical TE biopsy                          | Segmental length (Mb) | TE2                                  | TE3                                       | TE4                                       |
|-----------|--------------|-------------|-------------------------------------------|---------------------------------------------|-----------------------|--------------------------------------|-------------------------------------------|-------------------------------------------|
| C01       | 5AB          | 25          | unbalanced,XX,-4                          | unbalanced,XX,del(4)(p16.3q31.1)            | 141.21-49.82          | unbalanced,XX,del(4)(q31.1q35.2)     | unbalanced,XX,del(4)(q31.1q35.2)          | unbalanced,XX,-4                          |
| C02       | 5AA          | 28          | unbalanced,XY,dup(9)(p24.3q22.2)          | unbalanced,XY,dup(9)(p24.3q22.2)            | 92.33                 | unbalanced,XY,dup(9)(p24.3q22.2)     | unbalanced,XY,dup(9)(p24.3q22.2)          | unbalanced,XY,dup(9)(p24.3q22.2)          |
| C03       | 5AB          | 33          | unbalanced,XX,del(9)(p24.3p13.1)          | unbalanced,XX,del(9)(p24.3p13.1)            | 39.6                  | unbalanced,XX,del(9)(p24.3p13.1)     | unbalanced,XX,del(9)(p24.3p13.1)          | unbalanced,XX,del(9)(p24.3p13.1)          |
| C04       | 5BB          | 39          | unbalanced,XY,-17,dup(20)(p13p11.1)       | unbalanced,XY,-17,dup(20)(p13p11.1)         | 26.260                | unbalanced,XY,-17,dup(20)(p13p11.1)  | unbalanced,XY,-17,dup(20)(p13p11.1)       | unbalanced,XY,-17,dup(20)(p13p11.1)       |
| C05       | 5BB          | 32          | unbalanced,XY,del(3)(q11.1q29)            | unbalanced,XY,del(3)(q11.1q29)              | 104.46                | unbalanced,XY,del(3)(q11.1q29)       | unbalanced,XY,del(3)(q11.1q29)            | unbalanced,XY,del(3)(q11.1q29)            |
| C06       | 5AA          | 32          | unbalanced,XY,del(2)(p25.3p11.2)          | unbalanced,XY,del(2)(p25.3p11.2)            | 89.62                 | unbalanced,XY,del(2)(p25.3p11.2)     | unbalanced,XY,del(2)(p25.3p11.2)          | unbalanced,XY,del(2)(p25.3p11.2)          |
| C07       | 5AA          | 32          | unbalanced,XY,dup(2)(q11.1q37.3)          | unbalanced,XY,dup(2)(q11.1q37.3)            | 147.78                | unbalanced,XY,dup(2)(q11.1q37.3)     | unbalanced,XY,dup(2)(q11.1q37.3)          | unbalanced,XY,dup(2)(q11.1q37.3)          |
| C08       | 5AA          | 24          | unbalanced,XY,del(6)(q25.3q27)            | unbalanced,XY,del(6)(q25.3q27)              | 12.59                 | unbalanced,XY,del(6)(q25.3q27)       | unbalanced,XY,del(6)(q25.3q27)            | unbalanced,XY,del(6)(q25.3q27)            |
| C09       | 5BB          | 40          | unbalanced,XX,del(4)(p16.3p13)            | unbalanced,XX,del(4)(p16.3p13)              | 41.55                 | unbalanced,XX,del(4)(p16.3p13)       | unbalanced,XX,del(4)(p16.3p13)            | unbalanced,XX,del(4)(p16.3p13)            |
| C010      | 5BB          | 23          | unbalanced,XY,del(8)(p23.3p11.1)          | unbalanced,XY,del(8)(p23.3p11.1)            | 43.78                 | unbalanced,XY,del(8)(p23.3p11.1)     | unbalanced,XY,del(8)(p23.3p11.1)          | unbalanced,XY,del(8)(p23.3p11.1)          |
| C011      | 5BC          | 33          | unbalanced,XY,del(4)(q27q35.2)            | unbalanced,XY,del(4)(q27q35.2)              | 69.75                 | unbalanced,XY,del(4)(q27q35.2)       | unbalanced,XY,del(4)(q27q35.2)            | unbalanced,XY,del(4)(q27q35.2)            |
| C012      | 5BB          | 37          | unbalanced,XX,del(9)(p24.3p12)            | unbalanced,XX,del(9)(p24.3p12)              | 42.60                 | unbalanced,XX,del(9)(p24.3p12)       | unbalanced,XX,del(9)(p24.3p12)            | unbalanced,XX,del(9)(p24.3p12)            |
| C013      | 5BB          | 26          | unbalanced,XX,del(3)(p26.3p25.1)          | unbalanced,XX,del(3)(p26.3p25.1)            | 16.023                | unbalanced,XX,del(3)(p26.3p25.1)     | unbalanced,XX,del(3)(p26.3p25.1)          | unbalanced,XX,del(3)(p26.3p25.1)          |
| C014      | 6AB          | 40          | unbalanced,XY,+15,del(8)(q22.3q24.3)      | unbalanced,XY,+15,del(8)(q22.3q24.3)        | 40.59                 | unbalanced,XY,+15,del(8)(q22.3q24.3) | unbalanced,XY,+15,del(8)(q22.3q24.3)      | unbalanced,XY,+15,del(8)(q22.3q24.3)      |
| C015      | 5CB          | 22          | unbalanced,XY,del(5)(p15.33p14.1)         | unbalanced,XY,del(5)(p15.33p14.1)           | 27.86                 | unbalanced,XY,del(5)(p15.33p14.1)    | unbalanced,XY,del(5)(p15.33p14.1)         | unbalanced,XY,del(5)(p15.33p14.1)         |
| C016      | 3BB          | 26          | unbalanced,XY,del(18)(q12.1q23)           | unbalanced,XY,del(18)(q12.1q23)             | 45.68                 | unbalanced,XY,del(18)(q12.1q23)      | unbalanced,XY,del(18)(q12.1q23)           | unbalanced,XY,del(18)(q12.1q23)           |
| C017      | 4AA          | 39          | unbalanced,XY,+16,del(11)(p15.5p12)       | unbalanced,XY,+16,del(11)(p15.5p12)         | 40.80                 | unbalanced,XY,+16,del(11)(p15.5p12)  | unbalanced,XY,+16,del(11)(p15.5p12)       | unbalanced,XY,+16,del(11)(p15.5p12)       |
| C018      | 4BB          | 43          | unbalanced,XX,+1,-4,-6,+22                | unbalanced,XX,+1,-6,+22,del(4)(q25q35.2)    | 81.71                 | unbalanced,XX,+1,+22                 | unbalanced,XX,+1,+22                      | unbalanced,XX,+1,-4,-6,+22                |
| C020      | 5AB          | 33          | unbalanced,XX,dup(9)(p12q34.3)            | unbalanced,XX,dup(9)(p12q34.3)              | 99.74                 | unbalanced,XX,dup(9)(p12q34.3)       | unbalanced,XX,dup(9)(p12q34.3)            | balanced,XX                               |
| C021      | 5AA          | 39          | unbalanced,XX,+15,+16,del(8)(q24.13q24.3) | unbalanced,XX,+15,+16,del(8)(q24.13q24.3)   | 20.57                 | unbalanced,XX,+15,+16                | unbalanced,XX,+15,+16,del(8)(q24.13q24.3) | unbalanced,XX,+15,+16,del(8)(q24.13q24.3) |
| C022      | 5AA          | 31          | unbalanced,XX,del(7)(q11.23q36.3)         | unbalanced,XX,del(7)(q11.23q36.3)           | 86.537                | balanced,XX                          | unbalanced,XX,del(7)(q11.23q36.3)         | unbalanced,XX,del(7)(q11.23q36.3)         |
| C023      | 5AB          | 21          | unbalanced,XY,dup(17)(q12q25.3)           | unbalanced,XY,dup(17)(q12q25.3)             | 46.46                 | balanced,XY                          | unbalanced,XY,dup(17)(q12q25.3)           | balanced,XY                               |
| C024      | 5BB          | 29          | unbalanced,XX,del(3)(q13.11q29)           | unbalanced,XX,del(3)(q13.11q29)             | 92.40                 | balanced,XX                          | unbalanced,XX,del(3)(q13.11q29)           | balanced,XX                               |
| C025      | 5AA          | 39          | unbalanced,XX,+15,+16,dup(8)(p23.3q24.13) | unbalanced,XX,+15,+16,dup(8)(p23.3q24.13)   | 124.74                | unbalanced,XX,+15,+16                | unbalanced,XX,+15,+16                     | unbalanced,XX,+15,+16                     |
| C026      | 5AB          | 26          | unbalanced,XY,del(1)(q31.1q44)            | unbalanced,XY,del(1)(q31.1q44)              | 59.10-44.99-104.09    | unbalanced,XY,del(1)(q31.1q44)       | unbalanced,XY,del(1)(q21.1q44)            | unbalanced,XY,dup(1)(q32.1q44)            |
| C027      | 5BB          | 39          | unbalanced,XX,del(7)(q22.3q36.3)          | unbalanced,XX,del(7)(p22.3p11.1)            | 50.64-57.77-97.16     | unbalanced,XX,del(7)(q31.1q36.3)     | unbalanced,XX,del(7)(q11.21q36.3)         | unbalanced,XX,-7                          |
| C029      | 5CB          | 26          | unbalanced,XX,del(4)(q27q35.2)            | unbalanced,XX,del(4)(q27q35.2)              | 117.29-69.754-113.30  | unbalanced,XX,del(4)(q27q35.2)       | unbalanced,XX,del(4)(p16.3q25)            | unbalanced,XX,-4                          |
| C030      | 5AB          | 29          | balanced,XY                               | unbalanced,XY,del(5)(p15.33p11)             | 46.40                 | unbalanced,XY,del(5)(p15.33p11)      | unbalanced,XY,del(5)(p15.33p11)           | unbalanced,XY,del(5)(p15.33p11)           |
| C031      | 5BB          | 37          | balanced,XX                               | unbalanced,XX,del(1)(p36.33p36.11)          | 25.12                 | unbalanced,XX,del(1)(p36.33p36.11)   | unbalanced,XX,del(1)(p36.33p36.11)        | unbalanced,XX,del(1)(p36.33p36.11)        |
| C032      | 5BB          | 32          | balanced,XY                               | unbalanced,XY,dup(4)(q13.3q35.2)            | 115.59-93.66          | unbalanced,XY,del(4)(q22.3q35.2)     | balanced,XY                               | unbalanced,XY,-4                          |
| C033      | 6BB          | 26          | balanced,XX                               | unbalanced,XX,dup(9)(q21.11q34.3)           | 70.32                 | unbalanced,XX,dup(9)(q21.11q34.3)    | balanced,XX                               | unbalanced,XX,dup(9)(q21.11q34.3)         |
| C034      | 5AA          | 30          | balanced,XY                               | unbalanced,XY,del(12)(q21.31q24.33)         | 52.28                 | unbalanced,XY,del(12)(q21.31q24.33)  | unbalanced,XY,del(12)(q21.31q24.33)       | balanced,XY                               |
| C035      | 5AA          | 37          | balanced,XX                               | unbalanced,XX,dup(7)(p22.3p14.1)            | 40.07                 | balanced,XX                          | balanced,XX                               | balanced,XX                               |
| C036      | 5BB          | 29          | balanced,XX                               | unbalanced,XX,dup(4)(q21.22q35.2)           | 107.62                | balanced,XX                          | balanced,XX                               | balanced,XX                               |
| C037      | 5BB          | 29          | balanced,XX                               | unbalanced,XX,dup(8)(p23.3p22.3)            | 14.11                 | balanced,XX                          | balanced,XX                               | balanced,XX                               |
| C039      | 5AB          | 37          | unbalanced,XX,+21                         | unbalanced,XX,+21,del(4)(q32.1q35.2)        | 33.88                 | unbalanced,XX,+21                    | unbalanced,XX,+21                         | unbalanced,XX,+21                         |
| C040      | 5AB          | 21          | balanced,XY                               | unbalanced,XY,dup(X)(q24q28)                | 34.86                 | balanced,XY                          | balanced,XY                               | balanced,XY                               |
| C041      | 5AA          | 28          | balanced,XX                               | unbalanced,XX,dup(4)(q34.3q35.2)            | 11.96                 | balanced,XX                          | balanced,XX                               | balanced,XX                               |
| C042      | 5BB          | 29          | balanced,XX                               | unbalanced,XX,dup(11)(q13.3q25)             | 65.17                 | balanced,XX                          | balanced,XX                               | balanced,XX                               |
| C043      | 5AB          | 29          | balanced,XY                               | unbalanced,XY,dup(1)(p36.33p36.13)          | 16.60                 | balanced,XY                          | balanced,XY                               | balanced,XY                               |
| C044      | 5BB          | 45          | unbalanced,X0,-9,+12,-14                  | unbalanced,X0,-9,+12,-14,dup(6)(p25.3p22.3) | 22.01                 | unbalanced,X0,-9,+12,-14             | unbalanced,X0,-9,+12,-14                  | unbalanced,X0,-9,+12,-14                  |
| C045      | 5AB          | 39          | balanced,XX                               | unbalanced,XX,del(8)(q11.23q24.3)           | 90.53                 | balanced,XX                          | balanced,XX                               | balanced,XX                               |
| C046      | 5AB          | 25          | unbalanced,XY,+2                          | unbalanced,XY,+2,del(1)(p36.33p36.13)       | 16.60                 | unbalanced,XY,+2                     | unbalanced,XY,+2                          | unbalanced,XY,+2                          |
| C047      | 5AA          | 22          | balanced,XY                               | unbalanced,XY,dup(9)(p24.3p2)               | 13.88                 | balanced,XY                          | balanced,XY                               | balanced,XY                               |
| C048      | 5AA          | 22          | balanced,XY                               | unbalanced,XY,del(10)(q25.1q26.3)           | 27.76                 | balanced,XY                          | balanced,XY                               | balanced,XY                               |
| C049      | 5AB          | 26          | balanced,XX                               | unbalanced,XX,dup(16)(q11.2q24.3)           | 43.91                 | balanced,XX                          | balanced,XX                               | balanced,XX                               |
| C050      | 3BB          | 26          | balanced,XY                               | unbalanced,XY,dup(9)(q21.11q34.3)           | 70.31                 | balanced,XY                          | balanced,XY                               | balanced,XY                               |
| C051      | 5AA          | 36          | balanced,XX                               | unbalanced,XX,dup(16)(q11.2q24.3)           | 43.90                 | balanced,XX                          | balanced,XX                               | balanced,XX                               |
| C052      | 6BC          | 21          | balanced,XY                               | unbalanced,XY,dup(17)(q22q25.3)             | 30.65                 | balanced,XY                          | balanced,XY                               | balanced,XY                               |
| C053      | 5BB          | 32          | balanced,XY                               | unbalanced,XY,dup(3)(p26.3p11.1)            | 90.44                 | balanced,XY                          | balanced,XY                               | balanced,XY                               |
| C054      | 5BB          | 35          | unbalanced,XX,-22                         | unbalanced,XX,-22,dup(6)(q14.1q27)          | 94.30                 | unbalanced,XX,-22                    | unbalanced,XX,-22                         | unbalanced,XX,-22                         |
| C055      | 5BB          | 29          | balanced,XX                               | balanced,XX,dup(10)(q22.2q26.3)             | 59.94                 | balanced,XX                          | balanced,XX                               | balanced,XX                               |

|      |     |    |             |                              |       |             |                               |                               |
|------|-----|----|-------------|------------------------------|-------|-------------|-------------------------------|-------------------------------|
| C056 | 5AB | 29 | balanced,XX | balanced,XX,dup(X)[q21.1q28] | 76.18 | balanced,XX | balanced,XX                   | balanced,XX                   |
| C057 | 6BB | 36 | balanced,XY | balanced,XY                  |       | balanced,XY | unbalanced,XY,+8              | balanced,XY                   |
| C058 | 5AA | 23 | balanced,XY | balanced,XY                  |       | balanced,XY | balanced,XY                   | balanced,XY                   |
| C059 | 5AA | 23 | balanced,XY | balanced,XY                  |       | balanced,XY | balanced,XY                   | balanced,XY                   |
| C060 | 5BA | 23 | balanced,XY | balanced,XY                  |       | balanced,XY | balanced,XY                   | balanced,XY                   |
| C061 | 5AA | 23 | balanced,XY | balanced,XY                  |       | balanced,XY | balanced,XY                   | balanced,XY                   |
| C062 | 5BB | 36 | balanced,XX | balanced,XX                  |       | balanced,XX | balanced,XX                   | balanced,XX                   |
| C063 | 5AB | 23 | balanced,XY | balanced,XY                  |       | balanced,XY | balanced,XY                   | balanced,XY                   |
| C064 | 5AA | 23 | balanced,XY | balanced,XY                  |       | balanced,XY | balanced,XY                   | balanced,XY                   |
| C065 | 5AA | 31 | balanced,XX | balanced,XX                  |       | balanced,XX | balanced,XX                   | balanced,XX                   |
| C066 | 5AB | 36 | balanced,XX | balanced,XX                  |       | balanced,XX | balanced,XX                   | balanced,XX                   |
| C067 | 4BB | 31 | balanced,XX | balanced,XX                  |       | balanced,XX | balanced,XX                   | balanced,XX                   |
| C068 | 5AB | 36 | balanced,XX | balanced,XX                  | 60.51 | balanced,XX | unbalanced,XX,dup(6)(6q21q27) | unbalanced,XX,del(6)(6q21q27) |
| C069 | 5AA | 38 | balanced,XY | balanced,XY                  |       | balanced,XY | balanced,XY                   | balanced,XY                   |
| C070 | 4AA | 26 | balanced,XX | balanced,XX                  |       | balanced,XX | balanced,XX                   | balanced,XX                   |
| C072 | 4BB | 25 | balanced,XY | balanced,XY                  |       | balanced,XY | balanced,XY                   | balanced,XY                   |
| C073 | 4AA | 25 | balanced,XX | balanced,XX                  |       | balanced,XX | balanced,XX                   | balanced,XX                   |
| C074 | 5BB | 34 | balanced,XX | balanced,XX                  |       | balanced,XX | balanced,XX                   | balanced,XX                   |
| C075 | 5AA | 34 | balanced,XX | balanced,XX                  |       | balanced,XX | balanced,XX                   | balanced,XX                   |
| C076 | 5BC | 33 | balanced,XX | balanced,XX                  |       | balanced,XX | balanced,XX                   | unbalanced,XX,+14             |
| C077 | 5BC | 33 | balanced,XX | balanced,XX                  |       | balanced,XX | balanced,XX                   | balanced,XX                   |
| C077 | 5AB | 33 | balanced,XX | balanced,XX                  |       | balanced,XX | balanced,XX                   | balanced,XX                   |
| C079 | 5AB | 34 | balanced,XX | balanced,XX                  |       | balanced,XX | balanced,XX                   | balanced,XX                   |
| C080 | 5AB | 34 | balanced,XY | balanced,XY                  |       | balanced,XY | balanced,XY                   | balanced,XY                   |
| C081 | 5AB | 34 | balanced,XX | balanced,XX                  |       | balanced,XX | balanced,XX                   | balanced,XX                   |
| C082 | 5AB | 34 | balanced,XX | balanced,XX                  |       | balanced,XX | balanced,XX                   | balanced,XX                   |

**Table S3:** Logistic regression analysis using confirmation occurrence as independent variable to assess the co-variates involved in segmental aneuploidy confirmation following cTE biopsy diagnosis.

|                        | B      | S.E.  | df | Sig. | Exp(B) | 95% C.I. for EXP(B) |         |
|------------------------|--------|-------|----|------|--------|---------------------|---------|
|                        |        |       |    |      |        | Lower               | Upper   |
| center(1)              | -.445  | .612  | 1  | .468 | .641   | .193                | 2.127   |
| morpho                 |        |       | 3  | .804 |        |                     |         |
| morpho(good)           | .021   | .784  | 1  | .978 | 1.021  | .220                | 4.745   |
| morpho(average)        | -.256  | .798  | 1  | .748 | .774   | .162                | 3.702   |
| morpho(poor)           | .275   | .753  | 1  | .715 | 1.317  | .301                | 5.766   |
| dayOfBiopsy            |        |       | 2  | .991 |        |                     |         |
| dayOfBiopsy(6)         | .061   | .831  | 1  | .941 | 1.063  | .208                | 5.420   |
| dayOfBiopsy(7)         | .098   | .763  | 1  | .898 | 1.103  | .247                | 4.919   |
| FemaleAge              | .050   | .042  | 1  | .236 | 1.051  | .968                | 1.142   |
| sperm(1)               | -.409  | .470  | 1  | .385 | .664   | .264                | 1.670   |
| Male Age               | -.012  | .028  | 1  | .676 | .988   | .936                | 1.044   |
| Confirmed in second TE | 3.65   | .912  | 1  | .000 | 38.719 | 6.485               | 231.169 |
| Segmental Size         | .012   | .006  | 1  | .047 | 1.028  | 1.000               | 1.056   |
| Constant               | -1.442 | 2.136 | 1  | .500 | .003   | .027                |         |

|           | N   | Mean    | Std. Deviation | 95% Confidence Interval for Mean |             | Minimum | Maximum |
|-----------|-----|---------|----------------|----------------------------------|-------------|---------|---------|
|           |     |         |                | Lower Bound                      | Upper Bound |         |         |
|           |     |         |                | not confirmed                    | 52          |         |         |
| confirmed | 56  | 60.4070 | 33.87579       | 51.3350                          | 69.4790     | 12.59   | 147.78  |
| Total     | 108 | 53.9107 | 34.71073       | 47.2895                          | 60.5320     | .00     | 147.78  |

**Table S4: Demographic data of the study population**

|                                                                               |                                                                                                          |
|-------------------------------------------------------------------------------|----------------------------------------------------------------------------------------------------------|
| <b>Number of couples producing blastocysts with segmental aneuploidies, n</b> | 53                                                                                                       |
| <b>Maternal age, mean <math>\pm</math> SD (min-max)</b>                       | 38 $\pm$ 3 (31-44) yr                                                                                    |
| <b>Duration of infertility, mean <math>\pm</math> SD (min-max)</b>            | 3 $\pm$ 2 (1-10) yr                                                                                      |
| <b>Cause of Infertility, %</b>                                                | Idiopathic, 54%<br>Tubal factor, 7%<br>Endometriosis, 11%<br>Endocrine-ovulatory, 4%<br>Male factor, 24% |
| <b>Basal Follicle Stimulating Hormone, mean <math>\pm</math> SD (min-max)</b> | 7 $\pm$ 4 (3-11) IU/l                                                                                    |
| <b>Basal Anti-Mullerian Hormone, mean <math>\pm</math> SD (min-max)</b>       | 2 $\pm$ 1 (0.5-5) ng/ml                                                                                  |
| <b>Body Mass Index</b>                                                        | 20 $\pm$ 3 (16-23)                                                                                       |
| <b>Paternal age, mean <math>\pm</math> SD (min-max)</b>                       | 40 $\pm$ 5 (33-53) yr                                                                                    |
| <b>Sperm factor, %</b>                                                        | Normozoospermic, 51%<br>Moderate male factor, 25%<br>Severe male factor, 24%                             |
